# Supplementary material for: The NLRP3 inflammasome mediates DSS-induced intestinal inflammation in Nod2 knockout mice
Source: Innate Immun. 2019 Feb 6;25(2):132–43. doi: 10.1177/1753425919826367 (PMC6830860; doi:10.1177/1753425919826367)
Supplement: Supplemental Table - Supplemental material for The NLRP3 inflammasome mediates DSS-induced intestinal inflammation in Nod2 knockout mice [file Supplemental_Table.xlsx]

## Sheet: Sheet1
SampleID	Raw Reads	Merged Reads	Mapped Reads	Unmapped Reads
Umiker.W04.WT.UNT.Pool226	79	32	32	0
Umiker.WD10.WT.DSS.Pool226	217	86	86	0
Umiker.WD01.WT.DSS.Pool226	362	149	121	28
Umiker.N08.NOD2ko.UNT.Pool227	5535	1226	1157	69
Umiker.ND034.NOD2ko.DSS.Pool227	7022	2966	2766	200
Umiker.ND031.NOD2ko.DSS.Pool227	8352	3964	3666	298
Umiker.W10.WT.UNT.Pool227	8925	4066	3971	95
Umiker.ND036.NOD2ko.DSS.Pool227	9141	1673	1602	71
Umiker.W06.WT.UNT.Pool227	9259	3382	3166	216
Umiker.WD036.WT.DSS.Pool227	15184	4064	3554	510
Umiker.ND040.NOD2ko.DSS.Pool227	15222	5697	5294	403
Umiker.ND033.NOD2ko.DSS.Pool227	17752	5881	5567	314
Umiker.N07.NOD2ko.UNT.Pool227	21314	5386	5088	298
Umiker.WD037.WT.DSS.Pool227	21662	7436	6858	578
Umiker.WD031.WT.DSS.Pool227	21694	10808	10585	223
Umiker.WD039.WT.DSS.Pool227	24079	2102	1754	348
Umiker.WD032.WT.DSS.Pool227	24755	10738	10378	360
Umiker.ND039.NOD2ko.DSS.Pool227	24834	10753	10158	595
Umiker.N10.NOD2ko.UNT.Pool227	27037	1676	1487	189
Umiker.WD033.WT.DSS.Pool227	28553	12528	12403	125
Umiker.WD034.WT.DSS.Pool227	28932	13282	13189	93
Umiker.WD040.WT.DSS.Pool227	30175	14898	14774	124
Umiker.ND037.NOD2ko.DSS.Pool227	30902	2980	2631	349
Umiker.N05.NOD2ko.UNT.Pool226	31239	13926	11512	2414
Umiker.WD07.WT.DSS.Pool226	31656	12313	9925	2388
Umiker.WD020.WT.DSS.Pool226	32034	12660	10550	2110
Umiker.ND024.NOD2ko.DSS.Pool226	32037	13793	11665	2128
Umiker.WD012.WT.DSS.Pool226	33028	13189	11459	1730
Umiker.ND03.NOD2ko.DSS.Pool226	34739	13056	10876	2180
Umiker.ND017.NOD2ko.DSS.Pool226	34810	16635	14781	1854
Umiker.ND038.NOD2ko.DSS.Pool227	35918	3720	3299	421
Umiker.ND018.NOD2ko.DSS.Pool226	36452	18043	16339	1704
Umiker.WD038.WT.DSS.Pool227	37513	20283	20148	135
Umiker.WD027.WT.DSS.Pool226	38554	17662	14993	2669
Umiker.ND02.NOD2ko.DSS.Pool226	38715	15634	12990	2644
Umiker.WD08.WT.DSS.Pool226	38782	15543	13314	2229
Umiker.WD028.WT.DSS.Pool226	38789	16363	14645	1718
Umiker.W02.WT.UNT.Pool226	38951	17161	13894	3267
Umiker.ND10.NOD2ko.DSS.Pool226	39068	20997	18878	2119
Umiker.WD016.WT.DSS.Pool226	39329	16522	13242	3280
Umiker.WD013.WT.DSS.Pool226	39362	15295	13458	1837
Umiker.ND020.NOD2ko.DSS.Pool226	39443	18096	13898	4198
Umiker.WD06.WT.DSS.Pool226	39551	16592	12673	3919
Umiker.N04.NOD2ko.UNT.Pool226	39608	17644	13977	3667
Umiker.ND013.NOD2ko.DSS.Pool226	39798	16561	13171	3390
Umiker.ND035.NOD2ko.DSS.Pool227	39924	10471	9304	1167
Umiker.WD05.WT.DSS.Pool226	39951	16491	12574	3917
Umiker.ND08.NOD2ko.DSS.Pool226	39959	20851	18872	1979
Umiker.W01.WT.UNT.Pool226	40064	17554	13231	4323
Umiker.WD03.WT.DSS.Pool226	40305	15854	13262	2592
Umiker.WD026.WT.DSS.Pool226	40336	17821	14566	3255
Umiker.WD02.WT.DSS.Pool226	40586	16189	13751	2438
Umiker.ND016.NOD2ko.DSS.Pool226	40838	17255	13571	3684
Umiker.N01.NOD2ko.UNT.Pool226	40851	16346	13136	3210
Umiker.WD030.WT.DSS.Pool226	41012	17337	14859	2478
Umiker.WD014.WT.DSS.Pool226	41028	20065	16325	3740
Umiker.ND023.NOD2ko.DSS.Pool226	41277	18095	15612	2483
Umiker.WD025.WT.DSS.Pool226	41334	16803	14674	2129
Umiker.WD024.WT.DSS.Pool226	41656	18665	16284	2381
Umiker.WD015.WT.DSS.Pool226	41693	16209	12845	3364
Umiker.WD019.WT.DSS.Pool226	41790	16275	13469	2806
Umiker.ND021.NOD2ko.DSS.Pool226	41805	17471	14492	2979
Umiker.WD04.WT.DSS.Pool226	41859	17575	14776	2799
Umiker.ND014.NOD2ko.DSS.Pool226	41955	16454	13781	2673
Umiker.N02.NOD2ko.UNT.Pool226	42003	16157	13606	2551
Umiker.ND028.NOD2ko.DSS.Pool226	42477	18684	16731	1953
Umiker.WD018.WT.DSS.Pool226	42637	15804	13439	2365
Umiker.ND030.NOD2ko.DSS.Pool226	42841	17958	16293	1665
Umiker.W05.WT.UNT.Pool226	42965	18721	15277	3444
Umiker.WD023.WT.DSS.Pool226	43403	17995	15689	2306
Umiker.ND015.NOD2ko.DSS.Pool226	43664	18902	15298	3604
Umiker.ND012.NOD2ko.DSS.Pool226	43898	18136	14679	3457
Umiker.ND032.NOD2ko.DSS.Pool227	43991	21201	20509	692
Umiker.ND04.NOD2ko.DSS.Pool226	44340	19550	15385	4165
Umiker.ND05.NOD2ko.DSS.Pool226	44885	19276	15248	4028
Umiker.ND019.NOD2ko.DSS.Pool226	44923	21117	17989	3128
Umiker.ND06.NOD2ko.DSS.Pool226	45338	19319	15913	3406
Umiker.ND09.NOD2ko.DSS.Pool226	45493	20626	14828	5798
Umiker.WD035.WT.DSS.Pool227	45541	19553	18507	1046
Umiker.ND07.NOD2ko.DSS.Pool226	45542	22184	18788	3396
Umiker.ND027.NOD2ko.DSS.Pool226	45665	20224	17425	2799
Umiker.N03.NOD2ko.UNT.Pool226	45848	16192	12959	3233
Umiker.W03.WT.UNT.Pool226	45867	21038	16176	4862
Umiker.ND022.NOD2ko.DSS.Pool226	45898	18885	15415	3470
Umiker.WD011.WT.DSS.Pool226	45983	19055	15850	3205
Umiker.WD09.WT.DSS.Pool226	45986	18193	15793	2400
Umiker.ND011.NOD2ko.DSS.Pool226	46299	17533	14236	3297
Umiker.ND026.NOD2ko.DSS.Pool226	46966	20706	17067	3639
Umiker.WD021.WT.DSS.Pool226	48939	20254	17157	3097
Umiker.ND025.NOD2ko.DSS.Pool226	49052	20802	17160	3642
Umiker.WD022.WT.DSS.Pool226	49100	18089	16282	1807
Umiker.ND01.NOD2ko.DSS.Pool226	49376	19474	16243	3231
Umiker.WD029.WT.DSS.Pool226	49577	22623	18994	3629
Umiker.WD017.WT.DSS.Pool226	49694	19351	16230	3121
Umiker.ND029.NOD2ko.DSS.Pool226	52753	22766	19133	3633
Umiker.N09.NOD2ko.UNT.Pool227	53668	18600	16558	2042
Umiker.N06.NOD2ko.UNT.Pool227	59453	22737	22131	606
Umiker.W08.WT.UNT.Pool227	66784	30680	28545	2135
Umiker.W07.WT.UNT.Pool227	76420	34099	32206	1893
Umiker.W09.WT.UNT.Pool227	110773	46709	42073	4636
